# Supplementary material for: New Scoring System for Predicting Mortality in Patients with COVID-19
Source: PubMed Central journal article supplement — Yonsei Med J. 2021 Aug 17;62(9):806–13. doi: 10.3349/ymj.2021.62.9.806 (PMC8382723; doi:10.3349/ymj.2021.62.9.806), 2021-08-17
Supplement: ymj-62-806-s001.pdf [file ymj-62-806-s001.pdf]

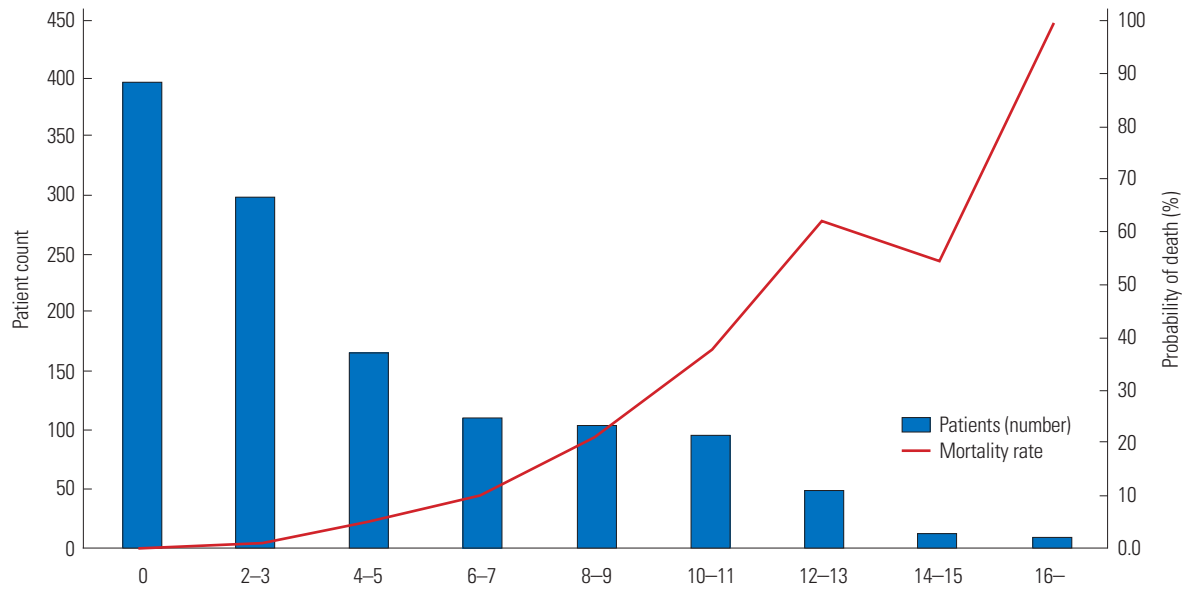

**Supplementary Fig. 1.** Calibration of the mortality prediction model of COVID-19 in the development group.
