# Supplementary material for: New Scoring System for Predicting Mortality in Patients with COVID-19
Source: PubMed Central journal article supplement — Yonsei Med J. 2021 Aug 17;62(9):806–13. doi: 10.3349/ymj.2021.62.9.806 (PMC8382723; doi:10.3349/ymj.2021.62.9.806), 2021-08-17
Supplement: ymj-62-806-s002.pdf [file ymj-62-806-s002.pdf]

**Supplementary Table 1.** Calibration of the Mortality Prediction Model of COVID-19 in the Development Group

| Cutoff value | No. of patients (%) | Sensitivity (95% CI) | Specificity (95% CI) | LR+ (95% CI)      | LR- (95% CI)      | PPV (95% CI)       | NPV (95% CI)      |
|--------------|---------------------|----------------------|----------------------|-------------------|-------------------|--------------------|-------------------|
| ≥0           | 1232                | 100.00 (97.0–100.0)  | 0.00 (0.0–0.3)       | 1.00 (1.0–1.0)    |                   | 10.0 (8.4–11.8)    |                   |
| >0           | 837                 | 99.19 (95.6–100.0)   | 35.53 (32.7–38.4)    | 1.54 (1.5–1.6)    | 0.023 (0.003–0.2) | 14.6 (12.3–17.2)   | 99.7 (98.6–100.0) |
| >2           | 550                 | 97.56 (93.0–99.5)    | 61.23 (58.3–64.1)    | 2.52 (2.3–2.7)    | 0.040 (0.01–0.1)  | 21.8 (18.4–25.5)   | 99.6 (98.7–99.9)  |
| >3           | 539                 | 96.75 (91.9–99.1)    | 62.13 (59.2–65.0)    | 2.55 (2.4–2.8)    | 0.052 (0.02–0.1)  | 22.1 (18.6–25.8)   | 99.4 (98.5–99.8)  |
| >4           | 424                 | 94.31 (88.6–97.7)    | 72.23 (69.5–74.8)    | 3.40 (3.1–3.8)    | 0.079 (0.04–0.2)  | 27.4 (23.2–31.9)   | 99.1 (98.2–99.7)  |
| >5           | 373                 | 90.24 (83.6–94.9)    | 76.38 (73.8–78.8)    | 3.82 (3.4–4.3)    | 0.13 (0.07–0.2)   | 29.8 (25.2–34.7)   | 98.6 (97.6–99.3)  |
| >6           | 302                 | 87.80 (80.7–93.0)    | 82.51 (80.1–84.7)    | 5.02 (4.3–5.8)    | 0.15 (0.09–0.2)   | 35.8 (30.4–41.5)   | 98.4 (97.4–99.1)  |
| >7           | 264                 | 81.30 (73.3–87.8)    | 85.21 (83.0–87.3)    | 5.50 (4.7–6.5)    | 0.22 (0.2–0.3)    | 37.9 (32.0–44.0)   | 97.6 (96.5–98.5)  |
| >8           | 219                 | 75.61 (67.0–82.9)    | 88.64 (86.6–90.4)    | 6.65 (5.5–8.1)    | 0.28 (0.2–0.4)    | 42.5 (35.8–49.3)   | 97.0 (95.8–98.0)  |
| >9           | 161                 | 63.41 (54.3–71.9)    | 92.52 (90.8–94.0)    | 8.47 (6.6–10.8)   | 0.40 (0.3–0.5)    | 48.4 (40.5–56.5)   | 95.8 (94.4–96.9)  |
| >10          | 134                 | 58.54 (49.3–67.3)    | 94.41 (92.9–95.7)    | 10.47 (7.9–13.9)  | 0.44 (0.4–0.5)    | 53.7 (44.9–62.4)   | 95.4 (93.9–96.5)  |
| >11          | 66                  | 34.96 (26.6–44.1)    | 97.93 (96.9–98.7)    | 16.86 (10.5–27.0) | 0.66 (0.6–0.8)    | 65.2 (52.4–76.5)   | 93.1 (91.5–94.5)  |
| >12          | 57                  | 30.89 (22.9–39.9)    | 98.29 (97.3–99.0)    | 18.03 (10.7–30.3) | 0.70 (0.6–0.8)    | 66.7 (52.8–78.7)   | 92.8 (91.1–94.2)  |
| >13          | 19                  | 11.38 (6.4–18.4)     | 99.55 (99.0–99.9)    | 25.25 (9.3–68.9)  | 0.89 (0.8–0.9)    | 73.7 (48.0–91.2)   | 91.0 (89.3–92.6)  |
| >14          | 9                   | 7.32 (3.4–13.4)      | 100.00 (99.7–100.0)  |                   | 0.93 (0.9–1.0)    | 100.0 (66.4–100.0) | 90.7 (88.9–92.2)  |
| >15          | 8                   | 6.50 (2.8–12.4)      | 100.00 (99.7–100.0)  |                   | 0.93 (0.9–1.0)    | 100.0 (63.1–100.0) | 90.6 (88.8–92.2)  |
| >16          |                     | 0.00 (0.0–3.0)       | 100.00 (99.7–100.0)  |                   | 1.00 (1.0–1.0)    |                    | 90.0 (88.2–91.6)  |

CI, confidence interval; LR, likelihood ratio; PPV, positive predictive value; NPV, negative predictive value.
